# Supplementary material for: High Levels of Structural Diversity Observed in Microcystins from Microcystis CAWBG11 and Characterization of Six New Microcystin Congeners
Source: PubMed Central journal article supplement (PMC4245536; doi:10.3390/md12115372), 2014-11-13
Supplement: marinedrugs-12-05372-s001.pdf [file marinedrugs-12-05372-s001.pdf]

## Supplementary Information

**Table S1.** Microcystin (MC) congeners produced by reported cyanobacterial strains.

**Table S2.** Tandem mass spectrometry fragment assignments for the CAWBG11 -RR microcystin (MC) congeners observed by electrospray ionization collision-induced dissociation.

**Table S3.** Tandem mass spectrometry fragment assignments for the CAWBG11 -XR microcystin (MC) congeners observed by matrix-assisted laser desorption/ionization post-source decay and electrospray ionization collision-induced dissociation.

**Table S4.** Tandem mass spectrometry fragment assignments for the CAWBG11 -RZ microcystin (MC) congeners observed by matrix-assisted laser desorption/ionization post-source decay and electrospray ionization collision-induced dissociation.

**Table S5.** Tandem mass spectrometry fragment assignments for the CAWBG11 -XA microcystin (MC) congeners observed by electrospray ionization collision-induced dissociation.

**Table S6.** Tandem mass spectrometry fragment assignments for the CAWBG11 -XAba microcystin (MC) congeners observed by electrospray ionization collision-induced dissociation.

**Table S7.** Tandem mass spectrometry fragment assignments for the CAWBG11 -XL microcystin (MC) congeners observed by electrospray ionization collision-induced dissociation.

**Table S8.** Electrospray high-resolution mass spectrometry data for microcystins (MC) present in sufficient quantities in *Microcystis* CAWBG11.

**Figure S1.** Advanced Marfey's amino acid analysis of MC-RA; extracted ion chromatograms of hydrolyzed MC-RA derivatized with L-FDLA.

**Figure S2.** Advanced Marfey's amino acid analysis of MC-RAba; extracted ion chromatograms of hydrolyzed MC-RAba derivatized with L-FDLA.

**Figure S3.** Box plots representing the spread in the number of microcystin congeners produced by reported cyanobacterial strains. Plots depict the number of microcystin congeners identified; 49 strains (a); the number of microcystin congeners observed; 49 strains (b) and the potential number of congeners which could be produced according to the reported data; 33 strains (c).

**Figure S4.** Microscopic images of *Microcystis* CAWBG11 acquired on an Olympus IX70 inverted microscope at 100× magnification (a) and at 1000× magnification (b).

**Table S1.** Microcystin (MC) congeners produced by reported cyanobacterial strains <sup>a</sup>.

| Cyanobacterial Strain  | Microcystins Identified                                                                                                                                                                                                                                                                                                                                                                                                                                                                         | Number of MCs <sup>b</sup> | Position Two <sup>c</sup> | Position Four <sup>d</sup> | Other Modifications                                | Potential MCs <sup>e</sup> | Reference(s) |
|------------------------|-------------------------------------------------------------------------------------------------------------------------------------------------------------------------------------------------------------------------------------------------------------------------------------------------------------------------------------------------------------------------------------------------------------------------------------------------------------------------------------------------|----------------------------|---------------------------|----------------------------|----------------------------------------------------|----------------------------|--------------|
| <i>Anabaena</i> 18B6   | [Dha <sup>7</sup> ] MC-RR; [Asp <sup>3</sup> , Dha <sup>7</sup> ] MC-RR; Unidentified MCs ×2                                                                                                                                                                                                                                                                                                                                                                                                    | 4                          | Arg                       | Arg                        | Position 3 × 2<br>Position 7 × 1                   | -                          | [1]          |
| <i>Anabaena</i> 60     | MC-LR; [Asp <sup>3</sup> ] MC-LR; MC-RR; [Asp <sup>3</sup> ] MC-RR                                                                                                                                                                                                                                                                                                                                                                                                                              | 4                          | Leu<br>Arg                | Arg                        | Position 3 × 2                                     | 4                          | [2]          |
| <i>Anabaena</i> 66     | [Dha <sup>7</sup> ] MC-HphR; [Dha <sup>7</sup> ] MC-HtyR; [Ser <sup>7</sup> ] MC-HtyR; [Asp <sup>3</sup> , Dha <sup>7</sup> ] MC-HtyR                                                                                                                                                                                                                                                                                                                                                           | 4                          | Hph<br>Hty                | Arg                        | Position 3 × 2<br>Position 7 × 2                   | 8                          | [2,3]        |
| <i>Anabaena</i> 66A    | [Dha <sup>7</sup> ] MC-LR; [Ser <sup>7</sup> ] MC-LR; [Asp <sup>3</sup> , Ser <sup>7</sup> ] MC-LR; [Asp <sup>3</sup> , Dha <sup>7</sup> ] MC-LR; [Dha <sup>7</sup> ] MC-FR; [Asp <sup>3</sup> , Dha <sup>7</sup> ] MC-FR; [Dha <sup>7</sup> ] MC-HphR; [Asp <sup>3</sup> , Dha <sup>7</sup> ] MC-HphR; MC-HtyR; [Dha <sup>7</sup> ] MC-HtyR; [Ser <sup>7</sup> ] MC-HtyR; [Asp <sup>3</sup> , Dha <sup>7</sup> ] MC-HtyR; [Asp <sup>3</sup> , Ser <sup>7</sup> ] MC-HtyR; Unidentified MCs ×20 | 33                         | Leu<br>Phe<br>Hph<br>Hty  | Arg                        | Position 3 × 2<br>Position 7 × 3                   | -                          | [1]          |
| <i>Anabaena</i> 90     | MC-LR; [Asp <sup>3</sup> ] MC-LR; [DMAdda <sup>5</sup> ] MC-LR; [Dha <sup>7</sup> ] MC-LR; [MeSer <sup>7</sup> ] MC-LR; [Asp <sup>3</sup> , MeSer <sup>7</sup> ] MC-LR; MC-HilR; [Asp <sup>3</sup> ] MC-HilR; MC-RR; [Asp <sup>3</sup> ] MC-RR; [Dha <sup>7</sup> ] MC-RR                                                                                                                                                                                                                       | 11                         | Leu<br>Hil<br>Arg         | Arg                        | Position 3 × 2<br>Position 5 × 2<br>Position 7 × 3 | 36                         | [1,2,4,5]    |
| <i>Anabaena</i> 141    | MC-LR; [Asp <sup>3</sup> ] MC-LR; MC-RR; [Asp <sup>3</sup> ] MC-RR                                                                                                                                                                                                                                                                                                                                                                                                                              | 4                          | Leu<br>Arg                | Arg                        | Position 3 × 2                                     | 4                          | [2]          |
| <i>Anabaena</i> 186    | [Dha <sup>7</sup> ] MC-E(OMe)E(OMe); [Ser <sup>7</sup> ] MC-E(OMe)E(OMe); [Asp <sup>3</sup> , Dha <sup>7</sup> ] MC-E(OMe)E(OMe); [Asp <sup>3</sup> , Ser <sup>7</sup> ] MC-E(OMe)E(OMe); [Dha <sup>7</sup> ] MC-EE(OMe); [Ser <sup>7</sup> ] MC-EE(OMe); [Asp <sup>3</sup> , Dha <sup>7</sup> ] MC-EE(OMe)                                                                                                                                                                                     | 7                          | Glu<br>Glu(OMe)           | Glu(OMe)                   | Position 3 × 2<br>Position 7 × 2                   | 8                          | [6]          |
| <i>Anabaena</i> 202 A1 | [Dha <sup>7</sup> ] MC-LR; [Asp <sup>3</sup> , Dha <sup>7</sup> ] MC-LR; [Ser <sup>7</sup> ] MC-LR; [Asp <sup>3</sup> , Ser <sup>7</sup> ] MC-HilR; [Dha <sup>7</sup> ] MC-RR; [Asp <sup>3</sup> , Dha <sup>7</sup> ] MC-RR; [Ser <sup>7</sup> ] MC-RR                                                                                                                                                                                                                                          | 7                          | Leu<br>Hil<br>Arg         | Arg                        | Position 3 × 2<br>Position 7 × 2                   | 12                         | [2,7]        |

Table S1. Cont.

|                                                 |                                                                                                                                                                                                                                                                                                                                                                                                             |    |                                 |                          |                                                    |    |            |
|-------------------------------------------------|-------------------------------------------------------------------------------------------------------------------------------------------------------------------------------------------------------------------------------------------------------------------------------------------------------------------------------------------------------------------------------------------------------------|----|---------------------------------|--------------------------|----------------------------------------------------|----|------------|
| <i>Anabaena</i> 202 A2                          | [Dha <sup>7</sup> ] MC-LR; [Asp <sup>3</sup> , Dha <sup>7</sup> ] MC-LR; [Ser <sup>7</sup> ] MC-LR;<br>[Dha <sup>7</sup> ] MC-RR; [Asp <sup>3</sup> , Dha <sup>7</sup> ] MC-RR; [Ser <sup>7</sup> ] MC-RR                                                                                                                                                                                                   | 6  | Leu<br>Arg                      | Arg                      | Position 3 × 2<br>Position 7 × 2                   | 8  | [2,5,7]    |
| <i>Anabaena flos-aquae</i><br>CYA83/1           | MC-LR; [Asp <sup>3</sup> ] MC-LR; MC-RR; [Asp <sup>3</sup> ] MC-RR;<br>[Glu(OMe) <sup>6</sup> ] MC-LR; [Asp <sup>3</sup> , Glu(OMe) <sup>6</sup> ] MC-LR                                                                                                                                                                                                                                                    | 6  | Leu<br>Arg                      | Arg                      | Position 3 × 2<br>Position 6 × 2                   | 8  | [8]        |
| <i>Anabaena flos-aquae</i><br>NRC 525-17        | MC-LR; [Asp <sup>3</sup> ] MC-LR; MC-HtyR; [Asp <sup>3</sup> ] MC-HtyR                                                                                                                                                                                                                                                                                                                                      | 4  | Leu<br>Hty                      | Arg                      | Position 3 × 2                                     | 4  | [9]        |
| <i>Fischerella</i><br>CENA161                   | MC-LR                                                                                                                                                                                                                                                                                                                                                                                                       | 1  | Leu                             | Arg                      |                                                    | 1  | [10]       |
| <i>Hapalosiphon</i><br><i>hibernicus</i> BZ-3-1 | MC-VA; [Asp <sup>3</sup> ] MC-VA; MC-LA; [Asp <sup>3</sup> ] MC-LA;<br>[Dha <sup>7</sup> ] MC-LA; [Asp <sup>3</sup> , DMAdda <sup>5</sup> ] MC-LA; MC-LV;<br>MC-LL; MC-RA; [Asp <sup>3</sup> ] MC-RA                                                                                                                                                                                                        | 10 | Val<br>Leu<br>Arg               | Ala<br>Val<br>Leu        | Position 3 × 2<br>Position 5 × 2<br>Position 7 × 2 | 72 | [1]        |
| <i>Microcystis</i><br>CAWBG11                   | MC-LA; [Asp <sup>3</sup> ] MC-LA; MC-FA; [Asp <sup>3</sup> ] MC-FA;<br>MC-YA; MC-WA; [Asp <sup>3</sup> ] MC-WA; MC-RA; [Asp <sup>3</sup> ]<br>MC-RA; MC-RAba; [Asp <sup>3</sup> ] MC-RAba; MC-RL;<br>MC-LAba; MC-FAba; MC-WAba; MC-LL; MC-FL;<br>MC-WL; MC-LR; [Asp <sup>3</sup> ] MC-LR; MC-FR; [Asp <sup>3</sup> ]<br>MC-FR; MC-YR; MC-WR; [Asp <sup>3</sup> ] MC-WR; MC-RR;<br>[Asp <sup>3</sup> ] MC-RR | 27 | Leu<br>Phe<br>Tyr<br>Trp<br>Arg | Ala<br>Aba<br>Leu<br>Arg | Position 3 × 2                                     | 40 | This Study |
| <i>Microcystis</i> HUB<br>5-2-4                 | MC-LR; dmMC-LR; MC-RR; dmMC-RR; MC-YR                                                                                                                                                                                                                                                                                                                                                                       | 5  | Leu<br>Tyr<br>Arg               | Arg                      | DM × 2                                             | 6  | [11]       |
| <i>Microcystis</i> MB-K                         | MC-LR; dmMC-LR; MC-YR; dmMC-YR                                                                                                                                                                                                                                                                                                                                                                              | 4  | Leu<br>Tyr                      | Arg                      | DM × 2                                             | 4  | [12]       |
| <i>Microcystis</i> MG-K                         | MC-RR; dmMC-RR; MC-WR                                                                                                                                                                                                                                                                                                                                                                                       | 3  | Arg<br>Trp                      | Arg                      | DM × 2                                             | 4  | [12]       |

Table S1. Cont.

|                                                    |                                                                                                                                                                                                                    |    |                   |                                 |                                  |    |        |
|----------------------------------------------------|--------------------------------------------------------------------------------------------------------------------------------------------------------------------------------------------------------------------|----|-------------------|---------------------------------|----------------------------------|----|--------|
| <i>Microcystis</i><br>PCC7806                      | MC-LR; [Asp <sup>3</sup> ] MC-LR; [Dha <sup>7</sup> ] MC-LR; [MeSer <sup>7</sup> ]<br>MC-LR; [Asp <sup>3</sup> , Dha <sup>7</sup> ] MC-LR; [Asp <sup>3</sup> , MeSer <sup>7</sup> ]<br>MC-LR; Unidentified MCs × 5 | 11 | Leu               | Arg                             | Position 3 × 2<br>Position 7 × 3 | -  | [1,13] |
| <i>Microcystis</i><br>PCC7813                      | MC-LR; [Asp <sup>3</sup> ] MC-LR                                                                                                                                                                                   | 2  | Leu               | Arg                             | Position 3 × 2                   | 2  | [11]   |
| <i>Microcystis</i><br><i>aeruginosa</i>            | MC-LR                                                                                                                                                                                                              | 1  | Leu               | Arg                             |                                  | 1  | [14]   |
| <i>Microcystis</i><br><i>aeruginosa</i> B2666      | MC-LA; [Asp <sup>3</sup> ] MC-LA; MC-LAba; [Asp <sup>3</sup> ] MC-LAba;<br>MC-LL; MC-LF; MC-LR; [MeSer <sup>7</sup> ] MC-LR                                                                                        | 8  | Leu               | Ala<br>Aba<br>Leu<br>Phe<br>Arg | Position 3 × 2<br>Position 7 × 2 | 20 | [15]   |
| <i>Microcystis</i><br><i>aeruginosa</i><br>CALU972 | [Dha <sup>7</sup> ] MC-LR; [Asp <sup>3</sup> , Dha <sup>7</sup> ] MC-LR; [Dha <sup>7</sup> ] MC-RR;<br>[Asp <sup>3</sup> , Dha <sup>7</sup> ] MC-RR; [Dha <sup>7</sup> ] MC-YR                                     | 5  | Leu<br>Tyr<br>Arg | Arg                             | Position 3 × 2<br>Position 7 × 1 | 6  | [16]   |
| <i>Microcystis</i><br><i>aeruginosa</i> K-139      | [Dha <sup>7</sup> ] MC-LR; [Asp <sup>3</sup> , Dha <sup>7</sup> ] MC-LR                                                                                                                                            | 2  | Leu               | Arg                             | Position 3 × 2<br>Position 7 × 1 | 2  | [5]    |
| <i>Microcystis</i><br><i>aeruginosa</i> MK10.10    | MC-VR; MC-LR; MC-HilR                                                                                                                                                                                              | 3  | Val<br>Leu<br>Hil | Arg                             |                                  | 3  | [17]   |
| <i>Microcystis</i><br><i>aeruginosa</i> NIES90     | MC-LR; MC-YR; MC-RR                                                                                                                                                                                                | 3  | Leu<br>Tyr<br>Arg | Arg                             |                                  | 3  | [18]   |

Table S1. Cont.

|                                        |                                                                                                                                             |    |                          |                                        |                                  |     |      |
|----------------------------------------|---------------------------------------------------------------------------------------------------------------------------------------------|----|--------------------------|----------------------------------------|----------------------------------|-----|------|
| <i>Microcystis aeruginosa</i> PCC7820  | MC-LR; dmMC-LR; [Glu(OMe) <sup>6</sup> ] MC-LR; MC-LF; dmMC-LF; MC-LW; dmMC-LW; MC-LL; MC-LM; MC-LY                                         | 10 | Leu                      | Arg<br>Phe<br>Leu<br>Met<br>Trp<br>Tyr | DM × 2<br>Position 6 × 2         | 24  | [19] |
| <i>Microcystis aeruginosa</i> TN-2     | MC-LR; MC-FR; [Asp <sup>3</sup> ] MC-FR; MC-WR; [Asp <sup>3</sup> ] MC-WR; MC-RR; MC-RA                                                     | 7  | Leu<br>Phe<br>Trp<br>Arg | Arg<br>Ala                             | Position 3 × 2                   | 16  | [20] |
| <i>Microcystis aeruginosa</i> UAM1303  | MC-LR; [Asp <sup>3</sup> ] MC-LR; [MeSer <sup>7</sup> ] MC-LR; MC-HilR; MC LY; MC-LF; MC-LW                                                 | 7  | Leu<br>Hil               | Arg<br>Tyr<br>Phe<br>Trp               | Position 3 × 2<br>Position 7 × 2 | 32  | [21] |
| <i>Microcystis aeruginosa</i> UTEX2666 | MC-LA; [Asp <sup>3</sup> ] MC-LA; MC-LAba; [Asp <sup>3</sup> , Glu(OMe) <sup>6</sup> ] MC-LAba; MC-LR; [Asp <sup>3</sup> ] MC-LR; didmMC-LR | 7  | Leu                      | Ala<br>Aba<br>Arg                      | Position 3 × 2<br>Position 6 × 2 | 24  | [21] |
| <i>Microcystis aeruginosa</i> UTEX2670 | MC-YA; MC-YL; MC-YM; MC-YM(O); Unidentified MC                                                                                              | 5  | Tyr                      | Ala<br>Leu<br>Met<br>Met(O)            |                                  | -   | [21] |
| <i>Microcystis aeruginosa</i> UV-006   | MC-LA; MC-LAba; MC-LV; MC-LL; MC-LR; [Asp <sup>3</sup> ] MC-LR; Unidentified MCs × 2                                                        | 8  | Leu                      | Ala<br>Aba<br>Val<br>Leu<br>Arg        | Position 3 × 2                   | ≥10 | [22] |
| <i>Microcystis novacekii</i> UAM250    | MC-LR; MC-YR; MC-RR                                                                                                                         | 3  | Leu<br>Tyr<br>Arg        | Arg                                    |                                  | 3   | [23] |

Table S1. Cont.

|                                       |                                                                                                                                                                                                                                                                                                                                                                                                                                                                                                                                                                                                                                                                                                                                                                                            |    |                                               |            |                                                                      |      |           |
|---------------------------------------|--------------------------------------------------------------------------------------------------------------------------------------------------------------------------------------------------------------------------------------------------------------------------------------------------------------------------------------------------------------------------------------------------------------------------------------------------------------------------------------------------------------------------------------------------------------------------------------------------------------------------------------------------------------------------------------------------------------------------------------------------------------------------------------------|----|-----------------------------------------------|------------|----------------------------------------------------------------------|------|-----------|
| <i>Microcystis viridis</i><br>NIES102 | [Asp <sup>3</sup> ] MC-LR; [Dha <sup>7</sup> ] MC-LR; [Ser <sup>1</sup> , Asp <sup>3</sup> , Dha <sup>7</sup> ]<br>MC-LR; MC-HilR; MC-FR; MC-YR; [Asp <sup>3</sup> ] MC-YR;<br>MC-HtyR; MC-WR; [Asp <sup>3</sup> ] MC WR; MC-RR; [Asp <sup>3</sup> ]<br>MC-RR; Unidentified MCs × 35                                                                                                                                                                                                                                                                                                                                                                                                                                                                                                       | 47 | Leu<br>Hil<br>Phe<br>Tyr<br>Hty<br>Trp<br>Arg | Arg        | Position 1 × 2<br>Position 3 × 2<br>Position 7 × 2                   | -    | [1]       |
| <i>Nostoc</i> 152                     | [Asp <sup>3</sup> , ADMAdda <sup>5</sup> ] MC-VR; [DMAdda <sup>5</sup> ] MC-LR;<br>[ADMAdda <sup>5</sup> ] MC-LR; [Mdhb <sup>7</sup> ] MC-LR;<br>[Ser <sup>1</sup> , ADMAdda <sup>5</sup> ] MC-LR; [Ser <sup>1</sup> , Asp <sup>3</sup> , ADMAdda <sup>5</sup> ]<br>MC LR; [Asp <sup>3</sup> , DMAdda <sup>5</sup> ] MC-LR; [ADMAdda <sup>5</sup> ,<br>MeSer <sup>7</sup> ] MC-LR; [ADMAdda <sup>5</sup> , Dha <sup>7</sup> ] MC-LR; [Asp <sup>3</sup> ,<br>ADMAdda <sup>5</sup> , Dha <sup>7</sup> ] MC-LR; [ADMAdda <sup>5</sup> ] MC-LHar;<br>[DMAdda <sup>5</sup> ]<br>MC-LHar; [Asp <sup>3</sup> , ADMAdda <sup>5</sup> ] MC-LHar;<br>[ADMAdda <sup>5</sup> ] MC-HilR; [ADMAdda <sup>5</sup> ] MC-HilHar;<br>[Asp <sup>3</sup> , ADMAdda <sup>5</sup> ] MC-HilR; Unidentified MCs × 9 | 25 | Val<br>Leu<br>Hil                             | Arg<br>Har | Position 1 × 2<br>Position 3 × 2<br>Position 5 × 3<br>Position 7 × 3 | ≥216 | [1,24–26] |
| <i>Nostoc</i> IO-102-I                | [ADMAdda <sup>5</sup> ] MC-LR; [DMAdda <sup>5</sup> ] MC-LR; [Asp <sup>3</sup> ,<br>ADMAdda <sup>5</sup> ] MC LR; [DMAdda <sup>5</sup> ] MC-HilR;<br>[ADMAdda <sup>5</sup> ] MC-YR; Unidentified MCs × 15                                                                                                                                                                                                                                                                                                                                                                                                                                                                                                                                                                                  | 20 | Leu<br>Hil<br>Tyr                             | Arg        | Position 3 × 2<br>Position 5 × 2                                     | -    | [1,27]    |
| <i>Nostoc</i> species                 | [Asp <sup>3</sup> , ADMAdda <sup>5</sup> , Dhb <sup>7</sup> ] MC-LR; [Asp <sup>3</sup> ,<br>ADMAdda <sup>5</sup> , Dhb <sup>7</sup> ] MC HtyR; [Asp <sup>3</sup> , ADMAdda <sup>5</sup> ,<br>Dhb <sup>7</sup> ] MC-RR                                                                                                                                                                                                                                                                                                                                                                                                                                                                                                                                                                      | 3  | Leu<br>Hty<br>Arg                             | Arg        | Position 3 × 1<br>Position 5 × 1<br>Position 7 × 1                   | 3    | [28]      |
| <i>Planktothrix</i> Max06             | [Asp <sup>3</sup> , DMAdda <sup>5</sup> ] MC-HtyR; [Asp <sup>3</sup> ] MC-YR; [Asp <sup>3</sup> ,<br>MeSer <sup>7</sup> ] MC-HtyR; [Asp <sup>3</sup> , MeSer <sup>7</sup> ] MC-LR; [Asp <sup>3</sup> ]<br>MC-HtyR; [Asp <sup>3</sup> ] MC-LR; [Asp <sup>3</sup> , Dha <sup>7</sup> ] MC-LR;<br>[Asp <sup>3</sup> ] MC-HilR; [Asp <sup>3</sup> , Glu(OMe) <sup>6</sup> ] MC-HtyR;<br>[Asp <sup>3</sup> ] MC-HphR; [Asp <sup>3</sup> , Glu(OMe) <sup>6</sup> ] MC-LR                                                                                                                                                                                                                                                                                                                         | 11 | Leu<br>Hil<br>Tyr<br>Hty<br>Hph               | Arg        | Position 3 × 1<br>Position 5 × 2<br>Position 6 × 2<br>Position 7 × 3 | 60   | [29]      |

Table S1. Cont.

|                                         |                                                                                                                                                                                                                                                                                                       |   |                   |            |                                                    |     |      |
|-----------------------------------------|-------------------------------------------------------------------------------------------------------------------------------------------------------------------------------------------------------------------------------------------------------------------------------------------------------|---|-------------------|------------|----------------------------------------------------|-----|------|
| <i>Planktothrix agardhii</i>            | [Asp <sup>3</sup> ] MC-LR; [Asp <sup>3</sup> ] MC-RR                                                                                                                                                                                                                                                  | 2 | Leu<br>Arg        | Arg        | Position 3 × 1                                     | 2   | [30] |
| <i>Planktothrix agardhii</i> 213        | [Asp <sup>3</sup> ] MC-LR; [Asp <sup>3</sup> , Dha <sup>7</sup> ] MC-LR; [Asp <sup>3</sup> ] MC-RR                                                                                                                                                                                                    | 3 | Leu<br>Arg        | Arg        | Position 3 × 1<br>Position 7 × 2                   | 4   | [1]  |
| <i>Planktothrix agardhii</i> CYA 56/3   | [Asp <sup>3</sup> ] MC-LY; [Asp <sup>3</sup> ] MC-LR; [Asp <sup>3</sup> ] MC-HtyR; [Asp <sup>3</sup> ] MC-RR; [Asp <sup>3</sup> , Dha <sup>7</sup> ] MC-RR; [Asp <sup>3</sup> ] MC-RY; [Asp <sup>3</sup> , Dha <sup>7</sup> ] MC-RY; [Asp <sup>3</sup> , DMAdda <sup>5</sup> ] MC-RY; Unidentified MC | 9 | Leu<br>Hty<br>Arg | Tyr<br>Arg | Position 3 × 1<br>Position 5 × 2<br>Position 7 × 2 | ≥24 | [31] |
| <i>Planktothrix agardhii</i> CYA 137    | [Asp <sup>3</sup> ] MC-LY; [Asp <sup>3</sup> ] MC-LR; [Asp <sup>3</sup> ] MC-HtyR; [Asp <sup>3</sup> ] MC-RR; [Asp <sup>3</sup> , Dha <sup>7</sup> ] MC-RR; [Asp <sup>3</sup> ] MC-RY; [Asp <sup>3</sup> , Dha <sup>7</sup> ] MC-RY; [Asp <sup>3</sup> , DMAdda <sup>5</sup> ] MC-RY; Unidentified MC | 9 | Leu<br>Hty<br>Arg | Tyr<br>Arg | Position 3 × 1<br>Position 5 × 2<br>Position 7 × 2 | ≥24 | [31] |
| <i>Planktothrix agardhii</i> CYA 532    | [Asp <sup>3</sup> ] MC-LY; [Asp <sup>3</sup> ] MC-LR; [Asp <sup>3</sup> ] MC-HtyR; [Asp <sup>3</sup> ] MC-RR; [Asp <sup>3</sup> , Dha <sup>7</sup> ] MC-RR; [Asp <sup>3</sup> ] MC-RY; [Asp <sup>3</sup> , Dha <sup>7</sup> ] MC-RY; [Asp <sup>3</sup> , DMAdda <sup>5</sup> ] MC-RY; Unidentified MC | 9 | Leu<br>Hty<br>Arg | Tyr<br>Arg | Position 3 × 1<br>Position 5 × 2<br>Position 7 × 2 | ≥24 | [31] |
| <i>Planktothrix agardhii</i> CYA 537    | [Asp <sup>3</sup> ] MC-LR; [Asp <sup>3</sup> ] MC-RR; [Asp <sup>3</sup> , Dha <sup>7</sup> ] MC-RR; Unidentified MC                                                                                                                                                                                   | 4 | Leu<br>Arg        | Arg        | Position 3 × 1<br>Position 7 × 2                   | ≥4  | [31] |
| <i>Planktothrix agardhii</i> CYA 544    | [Asp <sup>3</sup> ] MC-LR; [Asp <sup>3</sup> ] MC-RR; [Asp <sup>3</sup> , Dha <sup>7</sup> ] MC-RR; Unidentified MC                                                                                                                                                                                   | 4 | Leu<br>Arg        | Arg        | Position 3 × 1<br>Position 7 × 2                   | ≥4  | [31] |
| <i>Planktothrix agardhii</i> NIVA 126/8 | [Asp <sup>3</sup> ] MC-LR; [Asp <sup>3</sup> ] MC-RR; Unidentified MC                                                                                                                                                                                                                                 | 3 | Leu<br>Arg        | Arg        | Position 3 × 1                                     | -   | [1]  |
| <i>Planktothrix agardhii</i> PH-123     | [Asp <sup>3</sup> ] MC-LR; [Asp <sup>3</sup> , ADMAdda <sup>5</sup> ] MC-LR; [Asp <sup>3</sup> ] MC-HtyR; [Asp <sup>3</sup> , ADMAdda <sup>5</sup> ] MC-HtyR                                                                                                                                          | 4 | Leu<br>Hty        | Arg        | Position 3 × 1<br>Position 5 × 2                   | 4   | [32] |
| <i>Planktothrix rubescens</i> CYA 406   | [Asp <sup>3</sup> , Dhb <sup>7</sup> ] MC-LR; [Asp <sup>3</sup> , Dhb <sup>7</sup> ] MC-HtyR; [Asp <sup>3</sup> , Dhb <sup>7</sup> ] MC-RR; [Asp <sup>3</sup> , Dha <sup>7</sup> ] MC-RR; Unidentified MC                                                                                             | 5 | Leu<br>Hty<br>Arg | Arg        | Position 3 × 1<br>Position 7 × 2                   | ≥6  | [31] |

Table S1. Cont.

|                                       |                                                                                                                                                                                                                                                    |   |                   |                   |                                  |    |         |
|---------------------------------------|----------------------------------------------------------------------------------------------------------------------------------------------------------------------------------------------------------------------------------------------------|---|-------------------|-------------------|----------------------------------|----|---------|
| <i>Planktothrix rubescens</i> CYA 408 | [Asp <sup>3</sup> , Dhb <sup>7</sup> ] MC-LR; [Asp <sup>3</sup> , Dhb <sup>7</sup> ] MC-HtyR;<br>[Asp <sup>3</sup> , Dhb <sup>7</sup> ] MC-RR; [Asp <sup>3</sup> , Dha <sup>7</sup> ] MC-RR;<br>Unidentified MC                                    | 5 | Leu<br>Hty<br>Arg | Arg               | Position 3 × 1<br>Position 7 × 2 | ≥6 | [31]    |
| <i>Planktothrix rubescens</i> No80    | [Asp <sup>3</sup> , Dhb <sup>7</sup> ] MC-LY; [Asp <sup>3</sup> , Dhb <sup>7</sup> ] MC-LW;<br>[Asp <sup>3</sup> , Dhb <sup>7</sup> ] MC-HtyY; [Asp <sup>3</sup> , Dhb <sup>7</sup> ] MC-HtyHty;<br>[Asp <sup>3</sup> , Dhb <sup>7</sup> ] MC-HtyW | 5 | Leu<br>Hty        | Tyr<br>Hty<br>Trp | Position 3 × 1<br>Position 7 × 1 | 6  | [33,34] |

<sup>a</sup> An assessment of the microcystin diversity of 49 microcystin-producing strains reported in scientific journals; <sup>b</sup> Number of microcystins observed, including unidentified microcystins which the researchers noted during the studies; <sup>c</sup> Amino acids incorporated into position two of the microcystins reported to be produced by the cyanobacterial strain; <sup>d</sup> Amino acids incorporated into position four of the microcystins reported to be produced by the cyanobacterial strain; <sup>e</sup> Potential number of microcystins which could be produced by the cyanobacterial strain according to the information collected; In some cases this is omitted as the presence of unidentified microcystins makes this value difficult to estimate.



**Table S2.** Tandem mass spectrometry fragment assignments for the CAWBG11 -RR microcystin (MC) congeners observed by electrospray ionization collision-induced dissociation.

| Fragment Assignment <sup>a</sup>      | MC-RR                  |                      | [Asp <sup>3</sup> ] MC-RR |                      |
|---------------------------------------|------------------------|----------------------|---------------------------|----------------------|
|                                       | [M + 2H] <sup>2+</sup> | [M + H] <sup>+</sup> | [M + 2H] <sup>2+</sup>    | [M + H] <sup>+</sup> |
| M                                     | 519.8                  | 1038.6               | 512.8                     | 1024.6               |
| M – H <sub>2</sub> O                  | 510.7                  | 1020.4 <sup>b</sup>  | 503.7                     | 1006.4 <sup>b</sup>  |
| M – Mdha – H <sub>2</sub> O           | 469.2                  | 937.4 <sup>b</sup>   | 462.2                     | 923.4 <sup>b</sup>   |
| M – Adda sidechain                    | 452.8                  | 904.4                | 445.7                     | 890.3                |
| M – Adda sidechain – H <sub>2</sub> O | 443.7                  | 886.4                | 436.6                     | 872.3                |
| M – Adda                              | 363.2                  | 725.3                | 356.1                     | 711.3                |
| M – Adda – H <sub>2</sub> O           | 354.2                  | 707.3                | 347.1                     | 693.3                |
| Arg-Adda-Glu – NH <sub>3</sub>        |                        | 582.2                |                           | 582.2                |
| Arg-Adda – NH <sub>3</sub> + H        |                        | 453.2                |                           | 453.2                |
| Arg-Adda-Glu – CO                     |                        | 571.3                |                           | 571.2                |
| (Me)Asp-Arg-Adda-Glu                  |                        | 728.3                |                           | 714.2                |
| (Me)Asp-Arg-Adda                      |                        | 599.3                |                           | 585.2                |
| Arg-Adda-Glu                          |                        | 599.3                |                           | 599.2                |
| Mdha-Ala-Arg-(Me)Asp-Arg              | 298.2                  | 596.3                | 291.2                     | 582.2                |
| Mdha-Ala-Arg-(Me)Asp                  |                        | 440.2                |                           | 426.1                |
| Mdha-Ala-Arg                          |                        | 311.2                |                           | 311.1                |
| Mdha-Ala                              |                        | 155.1                |                           | 155.0                |
| Adda'-Glu-Mdha                        |                        | 375.2                |                           | 375.1                |
| Adda'                                 |                        | 163.1                |                           | 163.0                |
| (Me)Asp-Arg                           |                        | 286.2                |                           | 272.1                |
| Arg                                   |                        | 157.1                |                           | 157.1                |

<sup>a</sup> Adda' = Adda minus NH<sub>2</sub> and the sidechain (C<sub>9</sub>H<sub>11</sub>O); <sup>b</sup> [M + H]<sup>+</sup> ion was deconvoluted from the [M + 2H]<sup>2+</sup> ion.

**Table S3.** Tandem mass spectrometry fragment assignments for the CAWBG11 -XR microcystin (MC) congeners observed by matrix-assisted laser desorption/ionization post-source decay and electrospray ionization collision-induced dissociation.

| Fragment Assignment <sup>a</sup>                         | MC-LR         | [Asp <sup>3</sup> ] MC-LR | MC-FR         | [Asp <sup>3</sup> ] MC-FR | MC-YR         | MC-WR         | [Asp <sup>3</sup> ] MC-WR |
|----------------------------------------------------------|---------------|---------------------------|---------------|---------------------------|---------------|---------------|---------------------------|
|                                                          | X = 113 Da    | X = 113 Da                | X = 147 Da    | X = 147 Da                | X = 163 Da    | X = 186 Da    | X = 186 Da                |
| M + H                                                    | 995           | 981                       | 1029          | 1015                      | 1045          | 1068          | 1054                      |
| M – Ala + H                                              | 924           | 910                       | 958           | 944                       | 974           | 997           |                           |
| M – CH <sub>2</sub> NHCN <sub>2</sub> H <sub>3</sub> + H | 923           | 909                       | 957           | 943                       | 973           | 996           |                           |
| M – (Me)Asp + H                                          | 866           | 866                       | 900           | 900                       | 916           | 939           | 939                       |
| M – Glu + H                                              | 866           | 852                       | 900           | 886                       | 916           | 939           | 925                       |
| M – Adda sidechain + H                                   | 861           | 847                       | 895           | 881                       | 911           | 934           | 920                       |
| (Me)Asp-Arg-Adda-Glu + H                                 | 728           | 714                       | 728           | 714                       | 728           | 728           | 714                       |
| (Me)Asp-Arg-Adda + H                                     | 599           | 585                       | 599           | 585                       | 599           | 599           | 585                       |
| Arg-Adda-Glu + H                                         | 599           | 599                       | 599           | 599                       | 599           | 599           | 599                       |
| Arg-Adda + H                                             | 470           | 470                       | 470           | 470                       | 470           | 470           | 470                       |
| Mdha-Ala-X-(Me)Asp-Arg + NH <sub>4</sub>                 | 570           | 556                       | 604           | 590                       | 620           | 643           | 629                       |
| Ala-X-(Me)Asp-Arg + NH <sub>4</sub>                      | 487           | 473                       | 521           | 507                       | 537           | 560           | 546                       |
| Mdha-Ala-X-(Me)Asp-Arg + H                               | 553           | 539                       | 587           | 573                       | 603           | 626           | 612                       |
| Ala-X-(Me)Asp-Arg + H                                    | 470           | 456                       | 504           | 490                       | 520           | 543           | 529                       |
| X-(Me)Asp-Arg + H                                        | 399           |                           | 433           | 419                       | 449           |               |                           |
| Mdha-Ala-X-(Me)Asp + H                                   | 397           | 383                       | 431           |                           | 447           | 470           | 456                       |
| Mdha-Ala-X + H                                           | 268           | 268                       | 302           | 302                       | 318           | 341           | 341                       |
| Mdha-Ala + H                                             | 155           | 155                       | 155           | 155                       | 155           | 155           | 155                       |
| Adda'-Glu-Mdha-Ala + H                                   | 446           | 446                       | 446           | 446                       | 446           | 446           | 446                       |
| Adda'-Glu-Mdha + H                                       | 375           | 375                       | 375           | 375                       | 375           | 375           | 375                       |
| Adda' + H                                                | 163           | 163                       | 163           | 163                       | 163           | 163           | 163                       |
| Glu-Mdha + H                                             | 213           | 213                       | 213           | 213                       | 213           | 213           | 213                       |
| Adda sidechain                                           | 135           | 135                       | 135           | 135                       | 135           | 135           | 135                       |
| Arg related ions                                         | 70/84/112/174 | 70/84/112/174             | 70/84/112/174 | 70/84/112/174             | 70/84/112/174 | 70/84/112/174 | 70/84/112/174             |
| X immonium                                               | 86            | 86                        | 120           | 120                       | 136           | 159           | 159                       |

<sup>a</sup> X = Position two amino acid; Adda' = Adda minus NH<sub>2</sub> and the sidechain (C<sub>9</sub>H<sub>11</sub>O); CH<sub>2</sub>NHCN<sub>2</sub>H<sub>3</sub> is a fragment of the arginine sidechain; Fragment ions containing NH<sub>3</sub> and CO losses have been omitted.

**Table S4.** Tandem mass spectrometry fragment assignments for the CAWBG11 -RZ microcystin (MC) congeners observed by matrix-assisted laser desorption/ionization post-source decay and electrospray ionization collision-induced dissociation.

| Fragment Assignment <sup>a</sup>                                            | MC-RA<br>Z = 71 Da | [Asp <sup>3</sup> ] MC-RA<br>Z = 71 Da | MC-RAba<br>Z = 85 Da | [Asp <sup>3</sup> ] MC-RAba<br>Z = 85 Da | MC-RL<br>Z = 113 Da |
|-----------------------------------------------------------------------------|--------------------|----------------------------------------|----------------------|------------------------------------------|---------------------|
| M + H                                                                       | 953                | 939                                    | 967                  | 953                                      | 995                 |
| M – H <sub>2</sub> O + H                                                    | 935                | 921                                    | 949                  | 935                                      | 977                 |
| M – COOH + H                                                                | 908                | 894                                    | 922                  | 908                                      | 950                 |
| M – Z + H                                                                   | 882                | 868                                    | 882                  | 868                                      | 882                 |
| M – CH <sub>2</sub> NHCN <sub>2</sub> H <sub>3</sub> + H                    | 881                | 867                                    | 895                  | 881                                      | 923                 |
| M – Glu + H                                                                 | 824                | 810                                    | 838                  | 824                                      | 866                 |
| M – (Me)Asp + H                                                             | 824                | 824                                    | 838                  | 838                                      | 866                 |
| M – Adda sidechain + H                                                      | 819                | 787                                    | 833                  | 819                                      | 861                 |
| Mdha-Ala-Arg-(Me)Asp-Z + NH <sub>4</sub>                                    | 528                | 514                                    | 542                  | 528                                      | 570                 |
| Mdha-Ala-Arg-(Me)Asp-Z – H <sub>2</sub> O + NH <sub>4</sub>                 | 510                | 496                                    | 524                  | 510                                      | 552                 |
| Mdha-Ala-Arg-(Me)Asp-Z + H                                                  | 511                | 497                                    | 525                  | 511                                      | 553                 |
| Mdha-Ala-Arg-(Me)Asp – CH <sub>2</sub> NHCN <sub>2</sub> H <sub>3</sub> + H | 368                | 354                                    | 368                  | 354                                      | 368                 |
| Mdha-Ala-Arg-(Me)Asp + H                                                    | 440                | 426                                    | 440                  | 426                                      | 440                 |
| Mdha-Ala-Arg + H                                                            | 311                | 311                                    | 311                  | 311                                      | 311                 |
| Mdha-Ala + H                                                                | 155                | 155                                    | 155                  |                                          |                     |
| Arg-(Me)Asp-Z + H                                                           | 357                | 343                                    |                      | 357                                      |                     |
| Glu-Mdha-Ala-Arg – COOH + H                                                 | 395                | 395                                    | 395                  | 395                                      | 395                 |
| Glu-Mdha-Ala-Arg – CH <sub>2</sub> NHCN <sub>2</sub> H <sub>3</sub> + H     | 368                | 368                                    | 368                  | 368                                      | 368                 |
| Glu-Mdha-Ala-Arg + H                                                        | 440                | 440                                    | 440                  | 440                                      | 440                 |
| Glu-Mdha + H                                                                | 213                |                                        | 213                  |                                          |                     |
| Adda'-Glu-Mdha + H                                                          | 375                | 375                                    | 375                  | 375                                      | 375                 |
| Adda' + H                                                                   | 163                | 163                                    | 163                  |                                          |                     |

<sup>a</sup> Z = Position four amino acid; Adda' = Adda minus NH<sub>2</sub> and the sidechain (C<sub>9</sub>H<sub>11</sub>O); CH<sub>2</sub>NHCN<sub>2</sub>H<sub>3</sub> is a fragment of the arginine sidechain.

**Table S5.** Tandem mass spectrometry fragment assignments for the CAWBG11 -XA microcystin (MC) congeners observed by electrospray ionization collision-induced dissociation.

| Fragment Assignment <sup>a</sup>                  | MC-LA      | [Asp <sup>3</sup> ] MC-LA | MC-FA      | [Asp <sup>3</sup> ] MC-FA | MC-YA      | MC-WA      | [Asp <sup>3</sup> ] MC-WA |
|---------------------------------------------------|------------|---------------------------|------------|---------------------------|------------|------------|---------------------------|
|                                                   | X = 113 Da | X = 113 Da                | X = 147 Da | X = 147 Da                | X = 163 Da | X = 186 Da | X = 186 Da                |
| M + H                                             | 910        | 896                       | 944        | 930                       | 960        | 983        | 969                       |
| M – H <sub>2</sub> O + H                          | 892        | 878                       | 926        | 912                       | 942        | 965        | 951                       |
| M – Mdha – H <sub>2</sub> O + H                   | 809        | 795                       | 843        | 829                       |            | 882        | 868                       |
| M – Adda sidechain + H                            | 776        | 762                       | 810        | 796                       | 826        | 849        | 835                       |
| M – Adda sidechain – H <sub>2</sub> O + H         | 758        | 744                       | 792        | 778                       | 808        | 831        | 817                       |
| M – Adda + H                                      | 597        | 583                       | 631        | 617                       | 647        | 670        | 656                       |
| M – Adda – H <sub>2</sub> O + H                   | 579        | 565                       | 613        | 599                       | 629        | 652        |                           |
| Adda-Glu-Mdha-Ala-X-(Me)Asp – NH <sub>3</sub> + H | 822        | 808                       | 856        | 842                       | 872        | 895        | 881                       |
| Adda-Glu-Mdha-Ala-X – NH <sub>3</sub> + H         | 693        | 693                       | 727        | 727                       | 743        | 766        | 766                       |
| Adda-Glu-Mdha-Ala – NH <sub>3</sub> + H           | 580        | 580                       | 580        | 580                       | 580        | 580        | 580                       |
| Adda-Glu-Mdha – NH <sub>3</sub> + H               | 509        | 509                       | 509        | 509                       | 509        | 509        | 509                       |
| Adda'-Glu-Mdha-Ala-X + H                          | 559        | 559                       | 593        | 593                       | 609        | 632        | 632                       |
| Adda'-Glu-Mdha-Ala + H                            | 446        | 446                       | 446        | 446                       | 446        | 446        | 446                       |
| Adda'-Glu-Mdha + H                                | 375        | 375                       | 375        | 375                       | 375        | 375        | 375                       |
| Mdha-Ala-X-(Me)Asp-Ala + NH <sub>4</sub>          | 485        | 471                       | 519        | 505                       | 535        | 558        |                           |
| Ala-X-(Me)Asp-Ala + NH <sub>4</sub>               | 402        | 388                       | 436        | 422                       | 452        | 475        | 461                       |
| X-(Me)Asp-Ala + NH <sub>4</sub>                   | 331        | 317                       | 365        | 351                       | 381        | 404        | 390                       |
| Mdha-Ala-X-(Me)Asp-Ala + H                        | 468        | 454                       | 502        | 334                       | 518        | 541        | 527                       |
| Ala-X-(Me)Asp-Ala + H                             | 385        | 371                       | 419        | 405                       | 435        | 458        | 444                       |
| X-(Me)Asp-Ala + H                                 | 314        | 300                       | 348        | 488                       | 364        | 387        | 373                       |

<sup>a</sup> X = Position two amino acid; Adda' = Adda minus NH<sub>2</sub> and the sidechain (C<sub>9</sub>H<sub>11</sub>O).

**Table S6.** Tandem mass spectrometry fragment assignments for the CAWBG11 -XAba microcystin (MC) congeners observed by electrospray ionization collision-induced dissociation.

| Fragment Assignment <sup>a</sup>               | MC-LAba<br>X = 113 Da | MC-FAba<br>X = 147 Da | MC-WAba<br>X = 186 Da |
|------------------------------------------------|-----------------------|-----------------------|-----------------------|
| M + H                                          | 924                   | 958                   | 997                   |
| M - H <sub>2</sub> O + H                       | 906                   | 940                   | 979                   |
| M - Mdha - H <sub>2</sub> O + H                | 823                   | 857                   | 896                   |
| M - Adda sidechain + H                         | 790                   | 824                   | 863                   |
| M - Adda sidechain - H <sub>2</sub> O + H      | 772                   | 806                   | 845                   |
| M - Adda + H                                   | 611                   | 645                   | 684                   |
| M - Adda - H <sub>2</sub> O + H                | 593                   | 627                   | 666                   |
| Adda-Glu-Mdha-Ala-X-Masp - NH <sub>3</sub> + H |                       | 856                   | 895                   |
| Adda-Glu-Mdha-Ala-X - NH <sub>3</sub> + H      | 693                   | 727                   | 766                   |
| Adda-Glu-Mdha-Ala - NH <sub>3</sub> + H        | 580                   | 580                   | 580                   |
| Adda-Glu-Mdha - NH <sub>3</sub> + H            | 509                   | 509                   | 509                   |
| Adda'-Glu-Mdha-Ala-X + H                       | 559                   | 593                   | 632                   |
| Adda'-Glu-Mdha-Ala + H                         | 446                   | 446                   | 446                   |
| Adda'-Glu-Mdha + H                             | 375                   | 375                   | 375                   |
| Mdha-Ala-X-Masp-Aba + NH <sub>4</sub>          | 499                   | 533                   | 572                   |
| Ala-X-Masp-Aba + NH <sub>4</sub>               | 416                   | 450                   | 489                   |
| X-Masp-Aba + NH <sub>4</sub>                   | 345                   | 379                   | 418                   |
| Mdha-Ala-X-Masp-Aba + H                        | 482                   | 516                   | 555                   |
| Ala-X-Masp-Aba + H                             | 399                   | 433                   | 472                   |
| X-Masp-Aba + H                                 | 328                   | 362                   | 401                   |

<sup>a</sup> X = Position two amino acid; Adda' = Adda minus NH<sub>2</sub> and the sidechain (C<sub>9</sub>H<sub>11</sub>O).

**Table S7.** Tandem mass spectrometry fragment assignments for the CAWBG11 -XL microcystin (MC) congeners observed by electrospray ionization collision-induced dissociation.

| Fragment Assignment <sup>a</sup>               | MC-LL      | MC-FL      | MC-WL      |
|------------------------------------------------|------------|------------|------------|
|                                                | X = 113 Da | X = 147 Da | X = 186 Da |
| M + H                                          | 952        | 986        | 1025       |
| M - NH <sub>3</sub> + H                        | 935        | 969        | 1008       |
| M - H <sub>2</sub> O + H                       | 934        | 968        | 1007       |
| M - Mdha - H <sub>2</sub> O + H                | 851        | 885        | 924        |
| M - Adda sidechain + H                         | 818        | 852        | 891        |
| M - Adda sidechain - H <sub>2</sub> O + H      | 800        | 834        | 873        |
| M - Adda + H                                   | 639        | 673        | 712        |
| M - Adda - H <sub>2</sub> O + H                | 621        | 655        | 694        |
| Adda-Glu-Mdha-Ala-X-Masp - NH <sub>3</sub> + H |            | 856        | 895        |
| Adda-Glu-Mdha-Ala-X - NH <sub>3</sub> + H      | 693        | 727        | 766        |
| Adda-Glu-Mdha-Ala - NH <sub>3</sub> + H        | 580        | 580        | 580        |
| Adda-Glu-Mdha - NH <sub>3</sub> + H            | 509        | 509        | 509        |
| Glu-Mdha-Ala-X + H                             | 397        | 431        | 470        |
| Adda'-Glu-Mdha-Ala-X + H                       | 559        | 593        | 632        |
| Adda'-Glu-Mdha-Ala + H                         | 446        | 446        | 446        |
| Adda'-Glu-Mdha + H                             | 375        | 375        | 375        |
| Mdha-Ala-X-Masp-Leu + NH <sub>4</sub>          |            | 561        | 600        |
| Ala-X-Masp-Leu + NH <sub>4</sub>               |            | 478        | 517        |
| X-Masp-Leu + NH <sub>4</sub>                   |            | 407        | 446        |
| Unidentified fragment ion                      | 440        | 474        | 513        |
| Unidentified fragment ion                      | 535        | 535        | 535        |
| Mdha-Ala-X-Masp-Leu + H                        | 509        | 544        | 583        |
| Ala-X-Masp-Leu + H                             | 426        | 461        | 500        |
| X-Masp-Leu + H                                 | 355        | 390        | 429        |

<sup>a</sup> X = Position two amino acid; Adda' = Adda minus NH<sub>2</sub> and the sidechain (C<sub>5</sub>H<sub>11</sub>O).

**Table S8.** Electrospray high-resolution mass spectrometry data for microcystins (MC) present in sufficient quantities in *Microcystis* CAWBG11.

| Microcystin                    | Measured m/z |                        | Proposed Formula                                                  | Expected m/z | Deviation |
|--------------------------------|--------------|------------------------|-------------------------------------------------------------------|--------------|-----------|
| MC-LR (1)                      | 995.5560     | [M + H] <sup>+</sup>   | C <sub>49</sub> H <sub>75</sub> N <sub>10</sub> O <sub>12</sub>   | 995.5560     | +0.1 ppm  |
| MC-RR (3)                      | 519.7884     | [M + 2H] <sup>2+</sup> | C <sub>49</sub> H <sub>77</sub> N <sub>13</sub> O <sub>12</sub>   | 519.7902     | -3.4 ppm  |
| MC-YR (4)                      | 1045.5364    | [M + H] <sup>+</sup>   | C <sub>52</sub> H <sub>73</sub> N <sub>10</sub> O <sub>13</sub>   | 1045.5353    | +1.1 ppm  |
| [Asp <sup>3</sup> ] MC-LR (5)  | 981.5369     | [M + H] <sup>+</sup>   | C <sub>48</sub> H <sub>73</sub> N <sub>10</sub> O <sub>12</sub>   | 981.5404     | -3.6 ppm  |
| [Asp <sup>3</sup> ] MC-FR (6)  | 1015.5207    | [M + H] <sup>+</sup>   | C <sub>51</sub> H <sub>71</sub> N <sub>10</sub> O <sub>12</sub>   | 1015.5247    | -4.0 ppm  |
| MC-FR (7)                      | 1029.5411    | [M + H] <sup>+</sup>   | C <sub>52</sub> H <sub>72</sub> N <sub>10</sub> O <sub>12</sub>   | 1029.5404    | +0.6 ppm  |
| [Asp <sup>3</sup> ] MC-WR (8)  | 1054.5398    | [M + H] <sup>+</sup>   | C <sub>53</sub> H <sub>72</sub> N <sub>11</sub> O <sub>12</sub>   | 1054.5356    | +3.9 ppm  |
| MC-WR (9)                      | 1068.5465    | [M + H] <sup>+</sup>   | C <sub>54</sub> H <sub>74</sub> N <sub>11</sub> O <sub>12</sub>   | 1068.5513    | -4.5 ppm  |
| MC-RA (11)                     | 953.5122     | [M + H] <sup>+</sup>   | C <sub>46</sub> H <sub>69</sub> N <sub>10</sub> O <sub>12</sub>   | 953.5091     | +3.3 ppm  |
| MC-RAbA (13)                   | 967.5259     | [M + H] <sup>+</sup>   | C <sub>47</sub> H <sub>71</sub> N <sub>10</sub> O <sub>12</sub>   | 967.5247     | +1.1 ppm  |
| [Asp <sup>3</sup> ] MC-LA (16) | 918.4592     | [M + Na] <sup>+</sup>  | C <sub>45</sub> H <sub>67</sub> N <sub>7</sub> O <sub>12</sub> Na | 918.4583     | +1.0 ppm  |
| MC-LA (17)                     | 910.4936     | [M + H] <sup>+</sup>   | C <sub>46</sub> H <sub>68</sub> N <sub>7</sub> O <sub>12</sub>    | 910.4920     | +1.7 ppm  |
| MC-FA (19)                     | 966.4550     | [M + Na] <sup>+</sup>  | C <sub>49</sub> H <sub>65</sub> N <sub>7</sub> O <sub>12</sub> Na | 966.4583     | -3.3 ppm  |
| MC-WA (21)                     | 1005.4650    | [M + Na] <sup>+</sup>  | C <sub>51</sub> H <sub>66</sub> N <sub>8</sub> O <sub>12</sub> Na | 1005.4692    | -4.3 ppm  |
| MC-LAbA (22)                   | 946.4912     | [M + Na] <sup>+</sup>  | C <sub>47</sub> H <sub>69</sub> N <sub>7</sub> O <sub>12</sub> Na | 946.4896     | +1.7 ppm  |
| MC-FAbA (23)                   | 980.4744     | [M + Na] <sup>+</sup>  | C <sub>50</sub> H <sub>67</sub> N <sub>7</sub> O <sub>12</sub> Na | 980.4740     | +0.4 ppm  |
| MC-WAbA (24)                   | 1019.4836    | [M + Na] <sup>+</sup>  | C <sub>52</sub> H <sub>68</sub> N <sub>8</sub> O <sub>12</sub> Na | 1019.4849    | -1.3 ppm  |

**Figure S1.** Advanced Marfey's amino acid analysis of MC-RA; extracted ion chromatograms of hydrolyzed MC-RA derivatized with L-FDLA.

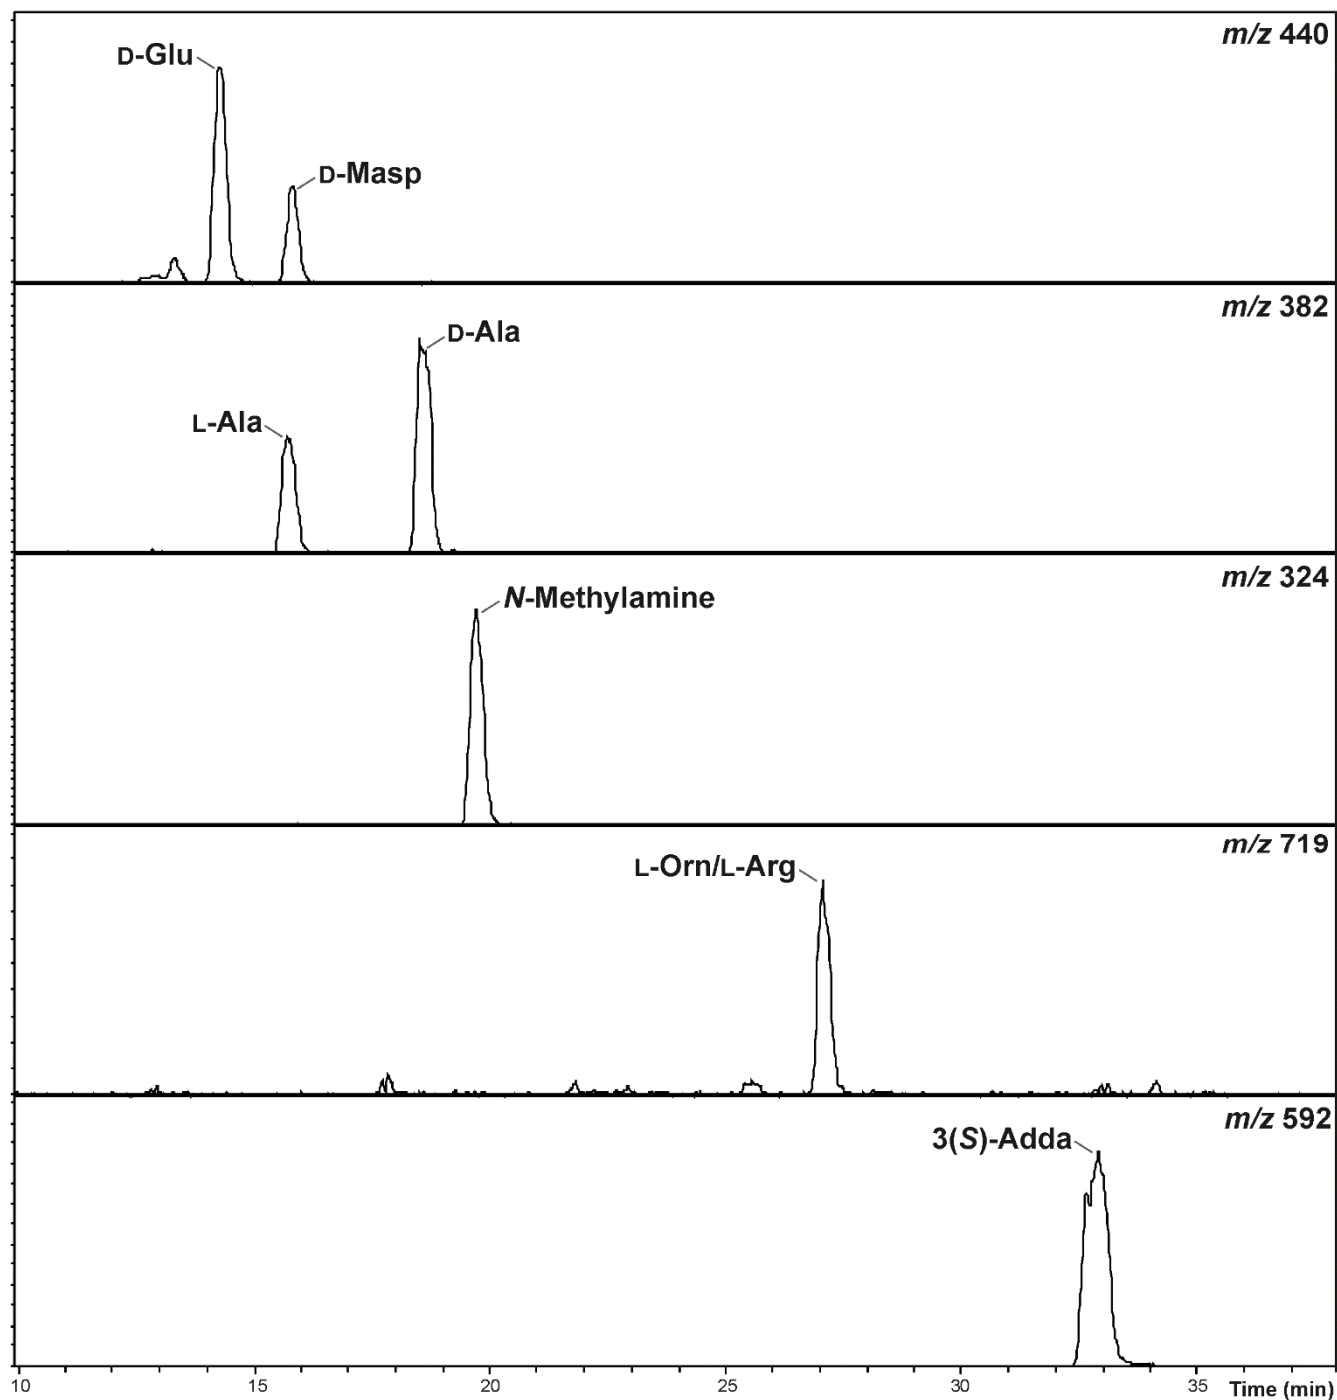

**Figure S2.** Advanced Marfey's amino acid analysis of MC-RAbA; extracted ion chromatograms of hydrolyzed MC-RAbA derivatized with L-FDLA.

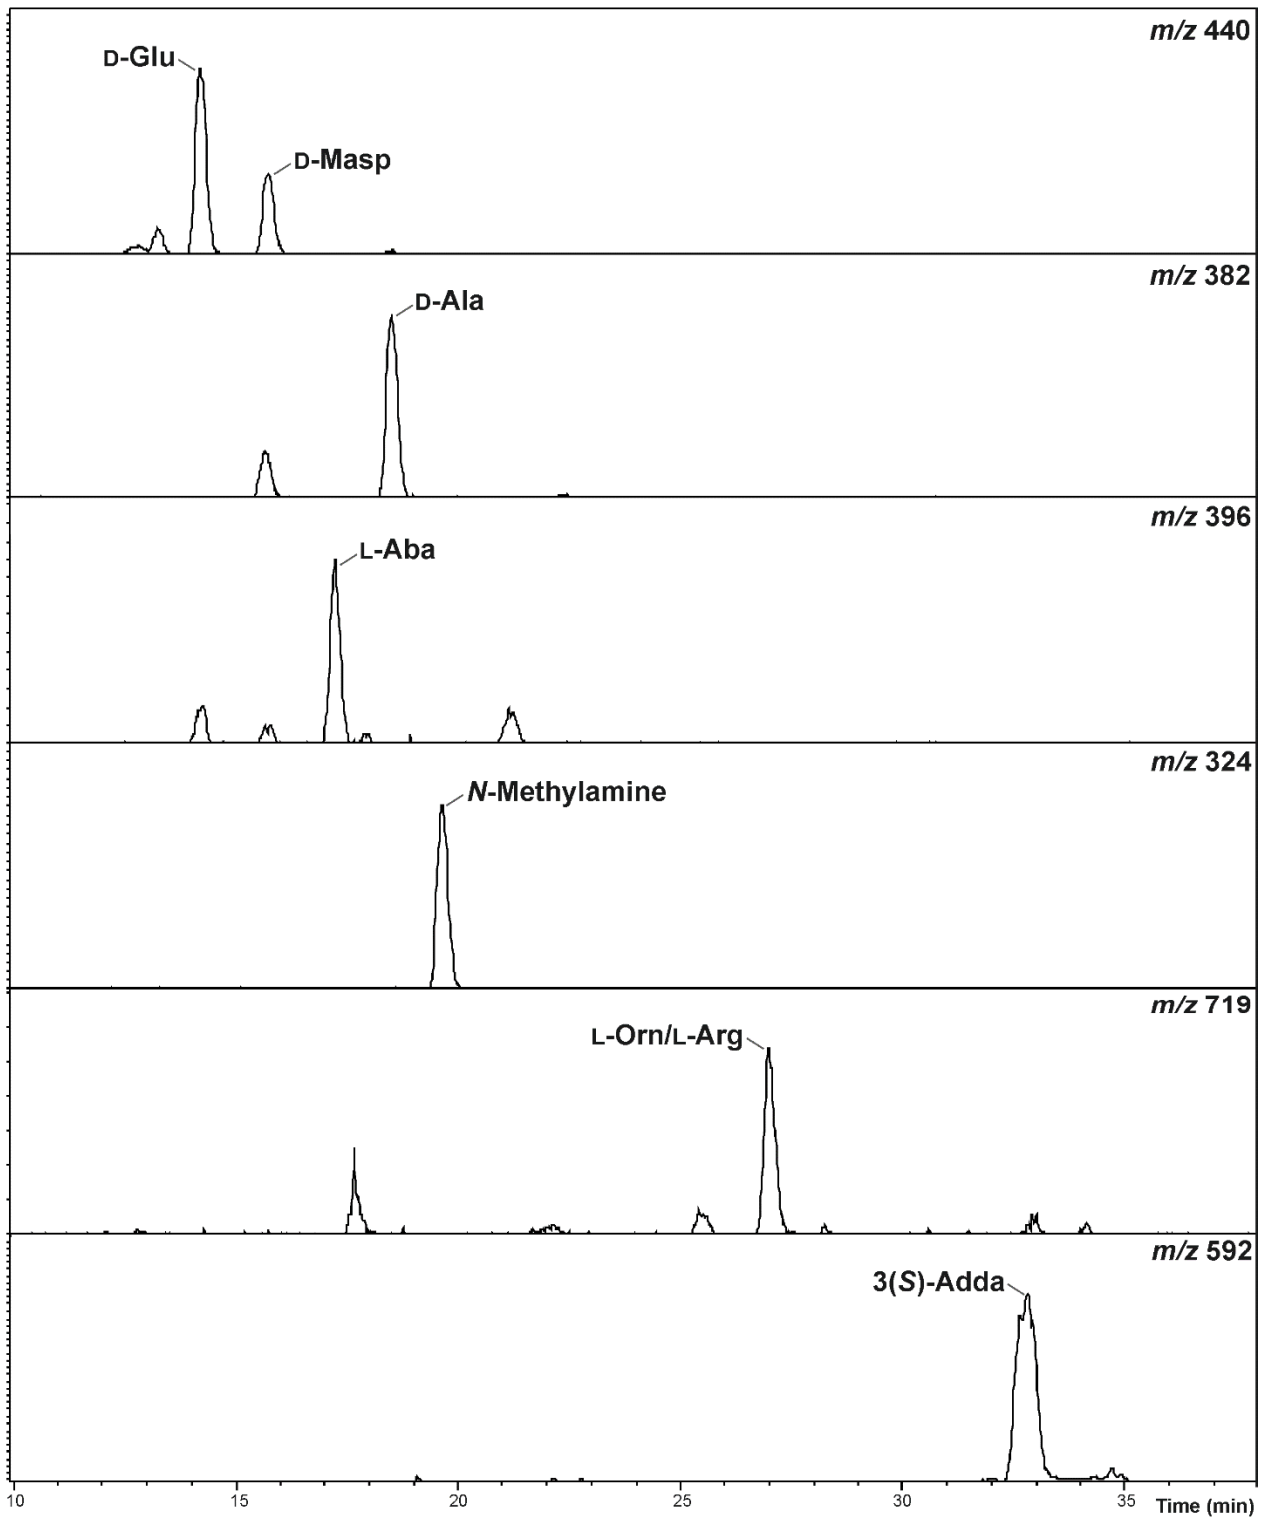



**Figure S3.** Box plots representing the spread in the number of microcystin congeners produced by reported cyanobacterial strains. Plots depict the number of microcystin congeners identified; 49 strains (a); the number of microcystin congeners observed; 49 strains (b) and the potential number of congeners which could be produced according to the reported data; 33 strains (c).

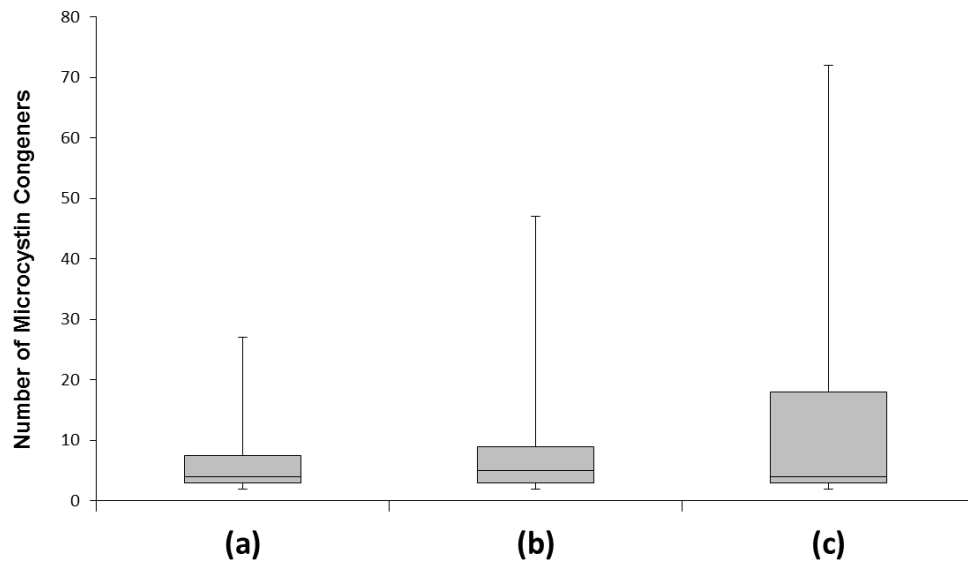

**Figure S4.** Microscopic images of *Microcystis* CAWBG11 acquired on an Olympus IX70 inverted microscope at 100 $\times$  magnification (a) and at 1000 $\times$  magnification (b).

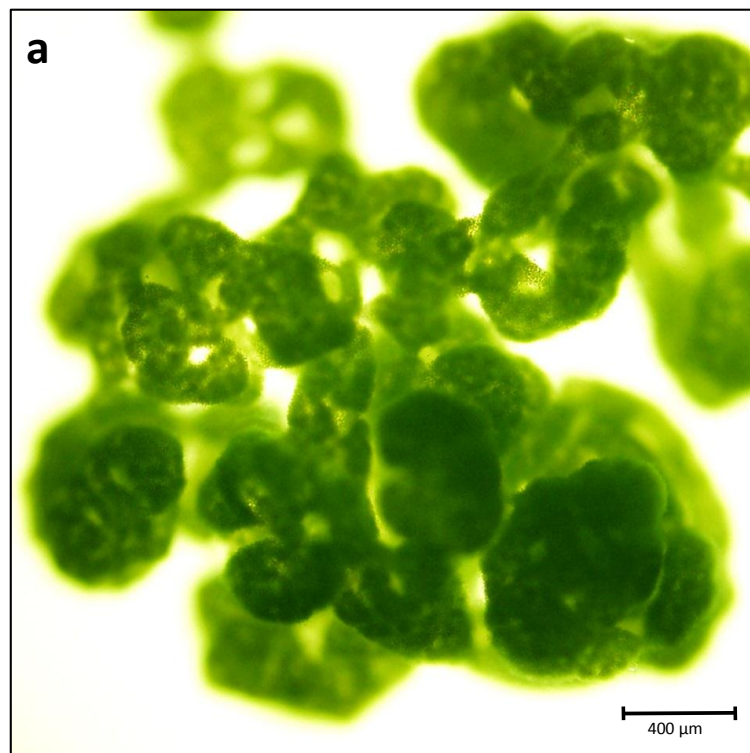

Figure S4. Cont.

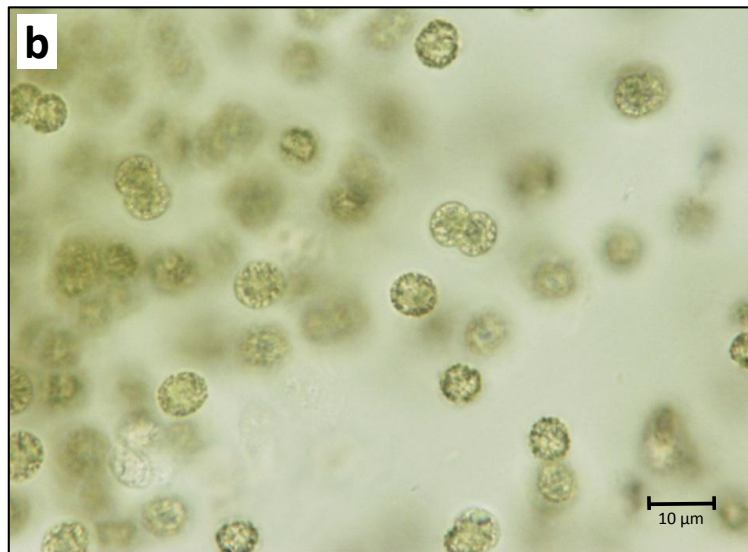

## References

1. Fewer, D.; Rouhiainen, L.; Jokela, J.; Wahlsten, M.; Laakso, K.; Wang, H.; Sivonen, K. Recurrent adenylation domain replacement in the microcystin synthetase gene cluster. *BMC Evol. Biol.* **2007**, *7*, 1–11.
2. Sivonen, K.; Namikoshi, M.; Evans, W.R.; Carmichael, W.W.; Sun, F.; Rouhiainen, L.; Luukkainen, R.; Rinehart, K.L. Isolation and characterization of a variety of microcystins from seven strains of the cyanobacterial genus *Anabaena*. *Appl. Environ. Microbiol.* **1992**, *58*, 2495–2500.
3. Namikoshi, M.; Sivonen, K.; Evans, W.R.; Carmichael, W.W.; Rouhiainen, L.; Luukkainen, R.; Rinehart, K.L. Structures of three new homotyrosine-containing microcystins and a new homophenylalanine variant from *Anabaena* sp. strain 66. *Chem. Res. Toxicol.* **1992**, *5*, 661–666.
4. Rapala, J.; Sivonen, K. Assessment of environmental conditions that favor hepatotoxic and neurotoxic *Anabaena* spp. strains cultured under light limitation at different temperatures. *Microb. Ecol.* **1998**, *36*, 181–192.
5. Fujii, K.; Sivonen, K.; Nakano, T.; Harada, K.-I. Structural elucidation of cyanobacterial peptides encoded by peptide synthetase gene in *Anabaena* species. *Tetrahedron* **2002**, *58*, 6863–6871.
6. Namikoshi, M.; Yuan, M.; Sivonen, K.; Carmichael, W.W.; Rinehart, K.L.; Rouhiainen, L.; Sun, F.; Brittain, S.; Otsuki, A. Seven new microcystins possessing two L-glutamic acid units, isolated from *Anabaena* sp. strain 186. *Chem. Res. Toxicol.* **1998**, *11*, 143–149.
7. Namikoshi, M.; Sivonen, K.; Evans, W.R.; Carmichael, W.W.; Sun, F.; Rouhiainen, L.; Luukkainen, R.; Rinehart, K.L. Two new L-serine variants of microcystins-LR and -RR from *Anabaena* sp. strains 202 A1 and 202 A2. *Toxicon* **1992**, *30*, 1457–1464.
8. Sivonen, K.; Skulberg, O.M.; Namikoshi, M.; Evans, W.R.; Carmichael, W.W.; Rinehart, K.L. Two methyl ester derivatives of microcystins, cyclic heptapeptide hepatotoxins, isolated from *Anabaena flos-aquae* strain CYA 83/1. *Toxicon* **1992**, *30*, 1465–1471.

9. Harada, K.-I.; Ogawa, K.; Kimura, Y.; Murata, H.; Suzuki, M.; Thorn, P.M.; Evans, W.R.; Carmichael, W.W. Microcystins from *Anabaena flos-aquae* NRC 525–17. *Chem. Res. Toxicol.* **1991**, *4*, 535–540.
10. Fiore, M.F.; Genuário, D.B.; da Silva, C.S.P.; Shishido, T.K.; Moraes, L.A.B.; Neto, R.C.; Silva-Stenico, M.E. Microcystin production by a freshwater spring cyanobacterium of the genus *Fischerella*. *Toxicon* **2009**, *53*, 754–761.
11. Fastner, J.; Erhard, M.; von Döhren, H. Determination of oligopeptide diversity within a natural population of *Microcystis* spp. (Cyanobacteria) by typing single colonies by matrix-assisted laser desorption ionization-time of flight mass spectrometry. *Appl. Environ. Microbiol.* **2001**, *67*, 5069–5076.
12. Beresovsky, D.; Hadas, O.; Livne, A.; Sukenik, A.; Kaplan, A.; Carmeli, S. Toxins and biologically active secondary metabolites of *Microcystis* sp. isolated from Lake Kinneret. *Isr. J. Chem.* **2006**, *46*, 79–87.
13. Tonk, L.; Welker, M.; Huisman, J.; Visser, P.M. Production of cyanopeptolins, anabaenopeptins, and microcystins by the harmful cyanobacteria *Anabaena* 90 and *Microcystis* PCC 7806. *Harmful Algae* **2009**, *8*, 219–224.
14. Dai, R.; Liu, H.; Qu, J.; Zhao, X.; Hou, Y. Effects of amino acids on microcystin production of the *Microcystis aeruginosa*. *J. Hazard. Mater.* **2009**, *161*, 730–736.
15. Diehnelt, C.W.; Dugan, N.R.; Peterman, S.M.; Budde, W.L. Identification of microcystin toxins from a strain of *Microcystis aeruginosa* by liquid chromatography introduction into a hybrid linear ion trap-fourier transform ion cyclotron resonance mass spectrometer. *Anal. Chem.* **2006**, *78*, 501–512.
16. Sivonen, K.; Namikoshi, M.; Evans, W.R.; Gromov, B.V.; Carmichael, W.W.; Rinehart, K.L. Isolation and structures of five microcystins from a Russian *Microcystis aeruginosa* strain CALU 972. *Toxicon* **1992**, *30*, 1481–1485.
17. Mazur-Marzec, H.; Browarczyk-Matusiak, G.; Forycka, K.; Kobos, J.; Plinski, M. Morphological, genetic, chemical and ecophysiological characterisation of two *Microcystis aeruginosa* isolates from the Vistula Lagoon, southern Baltic. *Oceanologia* **2010**, *52*, 127–146.
18. Erhard, M.; von Döhren, H.; Jungblut, P.R. Rapid typing and elucidation of new secondary metabolites of intact cyanobacteria using MALDI-TOF mass spectrometry. *Nat. Biotechnol.* **1997**, *15*, 906–909.
19. Robillot, C.; Vinh, J.; Puiseux-Dao, S.; Hennion, M.-C. Hepatotoxin production kinetics of the cyanobacterium *Microcystis aeruginosa* PCC 7820, as determined by HPLC-mass spectrometry and protein phosphatase bioassay. *Environ. Sci. Technol.* **2000**, *34*, 3372–3378.
20. Lee, T.-H.; Chou, H.-N. Isolation and identification of seven microcystins from a cultured M.TN-2 strain of *Microcystis aeruginosa*. *Bot. Bull. Acad. Sin.* **2000**, *41*, 197–202.
21. Del Campo, F.F.; Ouahid, Y. Identification of microcystins from three collection strains of *Microcystis aeruginosa*. *Environ. Pollut.* **2010**, *158*, 2906–2914.
22. Gademann, K.; Portmann, C.; Blom, J.F.; Zeder, M.; Jüttner, F. Multiple toxin production in the cyanobacterium *Microcystis*: Isolation of the toxic protease inhibitor cyanopeptolin 1020. *J. Nat. Prod.* **2010**, *73*, 980–984.

23. Li, H.; Murphy, T.; Guo, J.; Parr, T.; Nalewajko, C. Iron-stimulated growth and microcystin production of *Microcystis novacekii* UAM 250. *Limnol.-Ecol. Manag. Inland Waters* **2009**, *39*, 255–259.
24. Namikoshi, M.; Rinehart, K.L.; Sakai, R.; Sivonen, K.; Carmichael, W.W. Structures of three new cyclic heptapeptide hepatotoxins produced by the cyanobacterium (blue-green alga) *Nostoc* sp. strain 152. *J. Org. Chem.* **1990**, *55*, 6135–6139.
25. Sivonen, K.; Carmichael, W.W.; Namikoshi, M.; Rinehart, K.L.; Dahlem, A.M.; Niemela, S.I. Isolation and characterization of hepatotoxic microcystin homologs from the filamentous freshwater cyanobacterium *Nostoc* sp. strain 152. *Appl. Environ. Microbiol.* **1990**, *56*, 2650–2657.
26. Sivonen, K.; Namikoshi, M.; Evans, W.R.; Fardig, M.; Carmichael, W.W.; Rinehart, K.L. Three new microcystins, cyclic heptapeptide hepatotoxins, from *Nostoc* sp. strain 152. *Chem. Res. Toxicol.* **1992**, *5*, 464–469.
27. Oksanen, I.; Jokela, J.; Fewer, D.P.; Wahlsten, M.; Rikkinen, J.; Sivonen, K. Discovery of rare and highly toxic microcystins from lichen-associated cyanobacterium *Nostoc* sp. strain IO-102-I. *Appl. Environ. Microbiol.* **2004**, *70*, 5756–5763.
28. Beattie, K.A.; Kaya, K.; Sano, T.; Codd, G.A. Three dehydrobutyrine-containing microcystins from *Nostoc*. *Phytochemistry* **1998**, *47*, 1289–1292.
29. Welker, M.; Christiansen, G.; von Döhren, H. Diversity of coexisting *Planktothrix* (Cyanobacteria) chemotypes deduced by mass spectral analysis of microcystins and other oligopeptides. *Arch. Microbiol.* **2004**, *182*, 288–298.
30. Tonk, L.; Visser, P.M.; Christiansen, G.; Dittmann, E.; Snelder, E.O.F.M.; Wiedner, C.; Mur, L.R.; Huisman, J. The microcystin composition of the cyanobacterium *Planktothrix agardhii* changes toward a more toxic variant with increasing light intensity. *Appl. Environ. Microbiol.* **2005**, *71*, 5177–5181.
31. Miles, C.O.; Sandvik, M.; Haande, S.; Nonga, H.; Ballot, A. First use of LC-MS analysis with thiol derivatization to differentiate [Dhb<sup>7</sup>]- from [Mdha<sup>7</sup>]-microcystins: Analysis of cyanobacterial blooms, *Planktothrix* cultures and European crayfish from Lake Steinsfjorden, Norway. *Environ. Sci. Technol.* **2013**, *47*, 4080–4087.
32. Laub, J.; Henriksen, P.; Brittain, S.M.; Wang, J.; Carmichael, W.W.; Rinehart, K.L.; Moestrup, Ø. [ADMAdda<sup>5</sup>]-microcystins in *Planktothrix agardhii* strain PH-123 (cyanobacteria)-importance for monitoring of microcystins in the environment. *Environ. Toxicol.* **2002**, *17*, 351–357.
33. Christiansen, G.; Yoshida, W.Y.; Blom, J.F.; Portmann, C.; Gademann, K.; Hemscheidt, T.; Kurmayer, R. Isolation and structure determination of two microcystins and sequence comparison of the McyABC adenylation domains in *Planktothrix* species. *J. Nat. Prod.* **2008**, *71*, 1881–1886.
34. Niedermeyer, T.H.J.; Schmieder, P.; Kurmayer, R. Isolation of microcystins from the cyanobacterium *Planktothrix rubescens* strain No80. *Nat. Prod. Bioprospect.* **2014**, *4*, 37–45.
